# Supplementary material for: Role of Social Prescribing Link Workers in Supporting Adults with Physical and Mental Health Long-Term Conditions: Integrative Review
Source: Hindawi journal article supplement (doi:10.1155/2023/7191247), 2023-11-30
Supplement: f1 [file 7191247.f1.docx]

**Supplementary materials: Role of Social Prescribing Link Workers in supporting adults with physical and mental health long term conditions: integrative review**

Table S1. Methodological information of included studies.

| **Methodological information** | | | | | | | |
| --- | --- | --- | --- | --- | --- | --- | --- |
| **Reference information: Author, Year and Country** | **Type of study** | **Aim (s) of the study** | **Type of intervention/ programme** | **Aim (s) of the intervention/ programme** | **Data collection methods** | **Data analysis methods** | **CASP** |
| **Qualitative studies** | | | | | | | |
| 1. Frostick & Bertotti, 2021   UK | Qualitative interviews  (This is part of the evaluation of three social prescribing schemes). | To identify the training, skills and experience social prescribing Link Workers, working with patients presenting with long-term conditions, need to carry out their role safely and effectively within primary care services. | Link workers from three social prescribing schemes based within London and the South East of England. | Not specified | One-to-one interviews and focus groups. | Thematic analysis using NVivo software. | 7 of 9 |
| 1. Gibson, Moffatt & Pollard, 2022   UK | Ethnographic study  (This is part of a  larger, mixed methods evaluation of the social prescribing intervention). | The aim is to explore the socio‐temporal relations shaping participants experiences of a local social prescribing intervention. The focus is on the ways in which the intervention synchronised with the multitude of shifting, complex and often contradictory ‘timespaces’ of participants. | Social prescribing intervention ‘Ways to Wellness’. | The intervention aims to improve clients' health and wellbeing over a lengthy duration via prolonged contact between link workers and clients. | In addition to participant observation, fieldwork entailed an initial semi-structured interview, exit interviews, photo-elicitation interviews, interviews with family members, and data documenting client journeys (for example, notes made by link workers following client meetings). | Analysis was a continuous process throughout data collection and largely informed by reflexive field notes written directly after each research encounter.  Data were analysed in an iterative and inductive process of constant comparison and recoding of the data in order to capture points of significance, conceptual or otherwise.  Assistance of NVivo 10 was used. | 9 of 9 |
| 1. Griffith et al., 2023 UK | Ethnographic study  (This is part of a  larger, mixed methods evaluation of the social prescribing intervention). | By developing rich ethnographic accounts of link working within an established social prescribing intervention, we aimed to identify factors shaping delivery context and link worker practices through the interacting logics of choice and care, before examining how these practices resonated with contemporary social prescribing discourses and the stated aims and objectives of national policy. | Social prescribing intervention ‘Ways to Wellness’ for people with certain Long Term Conditions. | Ways to Wellness aims to improve health-related outcomes and quality of life of people with long-term conditions by increasing their confidence and ability to manage their illness, and to reduce costs and/or improve value to the NHS in their treatment. | Ethnographic observations (note taking), semi-structed interviews and focus groups. | Thematic content analysis supported by NVivo and using memos to assist in the process of moving from content-based descriptive themes to more conceptual themes. | 8 of 9 |
| 1. Hanlon et al., 2021   UK | Qualitative interviews  (This is part of a quasi-experimental study of RCT with process evaluation of the Links Worker Programme). | We use SDT to explore participants’ experience of the Links Worker Programme. This study aimed to investigate if SDT can be used to understand the change, or lack of change, resulting from patients’ involvement in the Links Worker Programme. | Deep-End Links Worker Programme. | The programme aims to improve wellbeing by connecting patients to appropriate community resources. | Semi-structured interviews. | A thematic analysis of the interviews was performed using line-by-line coding. | 7 of 9 |
| 1. Moffatt et al., 2017   UK | Qualitative interviews  (This is part of the Ways to Wellness programme). | This qualitative study aimed to capture the experiences of patients engaged with Ways to Wellness in its first 14 months of operation and to identify the impact of the Link Worker social prescribing programme on health and well-being. | Ways to Wellness social prescribing service. | Ways to Wellness provides a ‘hub’ model of social prescribing  in which a Link Worker trained in behaviour change methods offers a holistic and personalised service. | Semi-structured interviews. | Thematic analysis was used with data management supported by NVivo software. | 8 of 9 |
| 1. Morris et al., 2022   UK | Qualitative interviews  (This study was part of a larger evaluation of a social prescribing intervention). | This study explored service providers’ accounts of how a social prescribing intervention adapted to meet clients’ needs in the first wave of the COVID-19 pandemic alongside clients’ accounts of how the intervention worked for them. | VCSE-commissioned model of social prescribing. | Not specified | Telephone semi-structured interviews. | Thematic analysis. | 8 of 9 |
| 1. Rhodes & Bell, 2021   UK | Qualitative interviews. | The aim of this study was to explore the challenges of working as an SP and their experiences of training and support received as they develop in this new and evolving role. | SPs working in NHS and voluntary organisations in Greater London. | Not specified | Telephone and in-person semi-structured interviews. | Thematic analysis with NVivo software. | 8 of 9 |
| 1. Wildman, Moffatt, Steer et al., 2019   UK | Qualitative interviews  (This is part of the Ways to Wellness programme). | This study aimed to explore experiences of social prescribing among people with long-term conditions one to two years after their initial engagement with a social prescribing service. | Ways to Wellness’ social prescribing intervention. | Ways to Wellness is a holistic social prescribing intervention and as well as covering self-care and symptom management, the ‘Wellbeing Star’™ also addresses relationships, housing, debt, welfare benefits, and work or volunteering. | Semi-structured follow up interviews. | This study adopted a ‘grounded theory’ approach in that, rather than being guided by a particular theoretical perspective, it was led by service-users’ perspectives and focused on emergent narratives.  Thematic Analysis was used in addition together with NVivo software. | 8 of 9 |
| 1. Wildman, Moffatt, Penn et al., 2019   UK | Qualitative interviews  (This is part of the Ways to Wellness programme). | This qualitative study is the first to explore link workers’ own definitions of their role in social prescribing and the skills and qualities identified by link workers themselves as necessary for effective client linkage. This study also explores ‘threats’ to successful linked social prescribing and the challenges link workers face in carrying out their work. | Social prescribing intervention ‘Ways to Wellness’ for people with certain Long Term Conditions. | Ways to Wellness aims to improve health-related outcomes and quality of life of people with long-term conditions by increasing their confidence and ability to manage their illness, and to reduce costs and/or improve value to the NHS in their treatment. | Semi-structured one-to-one interviews and focus groups.  First phase:  15 interviews and 5 focus groups.  Second phase:  4 focus groups. | Thematic Analysis was used supported by NVivo software. | 8 of 9 |
| 1. Wood et al., 2021   UK | Realist evaluation of the service using qualitative methods. | This research set out to elucidate the mechanisms that facilitate engagement and positive outcomes with SP intervention among people with multiple health conditions and social needs. Researchers aimed to develop, test and refine the initial programme theory (that the benefits associated with SP derive from enacting collaborative care) using stakeholder experiences. | Community anchor organisation providing social prescribing service. | Provides SP to an inner-city area of high socioeconomic deprivation, predominantly deprived white working class council estates. Clients often have multiple health conditions including co-existing physical and mental health concerns. Most have social needs associated with housing, benefits and lack of support networks, are isolated. | Face-to-face and telephone interviews and focus groups in stakeholder workshop. | Analysis consisted of applying data to the four key elements of collaborative care using a Framework approach (i.e., iterative approach, moving between different sources of data and using deductive and inductive reasoning). | 8 of 9 |
| **Observational studies** | | | | | | | |
| 1. Elston et al., 2019   UK | A 12-month before-and-after study evaluation of the service. | To evaluate the impact of a ‘holistic’ link worker on older patients with multiple long-term conditions across three localities in South Devon. | Well-being Coordination service. | The aims were to reduce social isolation, improve health and activation, and to reduce the use of health and social care services. | Well-being Star™, Patient Activation Measure and Warwick-Edinburgh Mental Health and Well-being Scale and the Rockwood Clinical Frailty Scale. | The health outcomes and health and social care service use and cost were analysed by mean change in outcome or service contacts or costs 12 months before and after the first point of contact with the link-worker.  Descriptive and inferential statistical analyses used. | 14 of 14 |
| 1. Polley, Seers & Fixsen, 2019   UK | Formative service evaluation. A single arm, quasi-experimental pre-post, mixed-methods, data collection design to  investigate the longitudinal benefits | To evaluate the Shropshire social prescribing demonstrator site to understand why the social prescribing programme is being used and how well the components of the social prescribing model are working together. | The Shropshire social prescribing service. | The Shropshire social prescribing service is targeting health and social problems known to have a wide impact on its population. In practice this means identifying the people with low agency, and those who are at risk of either poor health in the future or finding themselves in difficult circumstances. Furthermore, relieving the load on GP practices was also identified as a key aim of this social prescribing service. | Measure Yourself Concerns and Wellbeing (MYCaW), Patient Activation Measure (PAM), De Jong Gierveld Loneliness scale, Working status and relationship status, Patient Satisfaction Survey (administered at 3-month follow-up only)  One-to-one semi-structured interviews. | Non parametric Wilcoxon Repeated Measures statistical tests.  Thematic analysis. | 12 of 14 |
| 1. Woodal et al., 2018   UK | Service evaluation. | The research sought to understand the outcomes of the service and, in addition, the processes which supported delivery. | The Wellbeing Coordinator service delivered in an area within a large city in Northern England. | ‘Wellbeing Coordinators’ who offer support to individuals, providing advice on local groups and services in their community. | Semi-structured telephone interviews and focus groups and questionnaires: Warwick-Edinburgh Mental Wellbeing Scale, EQ-5D the Campaign to End Loneliness Measurement Tool. | Thematic analysis.  Data were input into SPSS with appropriate descriptive and inferential statistics conducted as appropriate. | 11 of 14 |
| **Experimental studies** | | | | | | | |
| 1. Kiely et al., 2021   Ireland | Uncontrolled mixed methods pilot study | This paper reports the results of a pilot study conducted in preparation for a randomised controlled trial (RCT) that aims to test the effectiveness of primary care-based link workers providing social prescribing in improving health outcomes for people with multimorbidity who attend general practices in deprived areas in Ireland. | Deep End Ireland Link Worker intervention LinkMM trial in a single practice. | In this uncontrolled pilot study the feasibility of delivering this adapted intervention was tested within a single practice in relation to selection, recruitment, data collection and intervention processes to ensure they were timely and acceptable. The results informed the protocol for the definitive pragmatic randomised controlled trial (RCT) and economic evaluation. | The questionnaires collected basic demographic information and the following PROMs: EQ-5D-5L, Hospital Anxiety and Depression Scale, Frenchay Activity Index, Patient Activation Measure, Multimorbidity Burden of Treatment Questionnaire, Social Connectedness Scale.  Structured telephone interviews. | Simple descriptive statistics were used to describe patient demographic details and recruitment processes.  Data generated through the structured interviews were analysed using a qualitative descriptive approach | 6 of 13 |
| 1. Mercer et al., 2019   UK | Quasi-experimental cluster-randomized controlled trial (Quantitative) | To assess the effect of a primary care–based community-links practitioner (CLP) intervention on patients’ quality of life and well-being. | The Glasgow Deep End Links Worker  Programme (LWP) | To help people in areas of  deprivation to “live well” in their communities by providing an attached community-links practitioner (CLP) to general practices | EQ-5D-5L, Investigating Choice Experiments for the Preferences of Older People Capability Measure for Adults (ICECAP-A, HADS, the Work and Social Adjustment Scale, burden of multimorbidity, and self-reported lifestyle activities. | Primary analysis was on an intention-to-treat basis (all patients referred to a CLP) using all available data.  Subgroup analysis was conducted on patients who actually attended a CLP face-to-face consultation. Differences between groups were tested with appropriate  mixed-effects linear or generalized linear regression models, allowing clustering by practice. | 9 of 13 |
| **Evidence reviews** | | | | | | | |
| **Reference information: Author, Year and Country** | **Type of review** | **Review question (s)** | **Type of programme (s) reviewed** | **Countries reviewed** | **Type of study design (s) reviewed** | | **CASP** |
| 1. Bertotti et al., 2019 | Systematic mapping | This research aimed to systematically map the literature on navigation roles operating in primary care in the last ten years (since 2009). | Grey and peer reviewed literature on a number of different navigator roles from within primary care in the UK. | Studies in the UK | The design of more than half (54 %) of all articles included in this review employed qualitative methods of investigation. Fewer articles included were systematic reviews (n=2), scoping study (n=2) and secondary data analysis (n=5). Not many of the articles included adopted intervention study designs, however of those included more than half (60%) used pre and post-test designs and nearly one quarter of the intervention studies adopted randomised controlled trial designs (20%) and longitudinal study design (20%). | | 8 of 10 |
| 1. Pescheny, Randhawa& Pappas, 2019 | Systematic review | This systematic review aimed to assess the evidence of service user outcomes of social prescribing programmes based on primary care and involving navigators. | This review focussed on SP models in the UK based on general practice involving a navigator. | Studies in the UK | The included evaluations were heterogeneous in study design, including: 1 randomized controlled trial (RCT), 1 controlled before after study (non-RCT), 2 mixed methods studies, 1 uncontrolled before after study, 1 qualitative study and 10 mixed methods reports. | | 8 of 10 |
| 1. Public Health England, 2019 | Rapid evidence review | This evidence synthesis aims to determine the effectiveness of social prescribing in the UK. | Any form of social prescribing (social prescribing, community referral or wellbeing  programme) which involved referral from healthcare professionals in primary care settings (for example, GP or other primary care professional) to a link worker or facilitator of social prescribing. | Studies in the UK | 1 cluster RCT, 1 controlled pre/post study and 6 uncontrolled pre/post studies. | | 8 of 10 |

Table S2. Illustration of data synthesis.

| **Theme (s)** | **Sub-theme (s)** | **Evidence from identified studies (i.e., Quote (s) and/ or Text, Reference No)** |
| --- | --- | --- |
| The process of support | 1.1 Discovering what matters most to patients | “A major focus of the work was to empower the patient to make their own choices, also have the space and time to explore the context of patients’ lives and ask what they thought might help them.” [63]  “It’s much easier just to be a link worker. It really is. Just do an assessment, bang, bang, bang, link is there, there and there. That’s easy. That misses the person. That treats them more like a condition. You’ve got to see the person.” [65]  “This meant addressing what mattered to the client, such as securing income, improving housing conditions or becoming more socially connected. Within this approach, a client’s ‘goal’ was not decided through a wellbeing tool but might be as simple as ‘attending the next appointment’.” [65]  “What it did, believe it or not, in my opinion, is it put a goal in front of me, you know? It gave me a target to say “well, how can I do this?” [66]  “CLP allowed them to voice their priorities and have control over what goals were set. This was seen as a contrast to many of the other interactions they experienced other areas of their lives.” [66]  “Meetings with the social prescribing advisor were seen as central to the social prescribing service, through a process of co-production, could establish their health needs and put a plan into place.” [74]  “Participants appreciated the fact that it was that it was more like a sort of discussion about what they wanted and what was going to work for them.” [74]  “Link workers stressed the importance of delivering a non-directive service, viewing their role very much as co-producers of change: It's not an ‘us and them’ it's an ‘us’, it's got to be together”. [71]  “Both service users and staff discussed the co-constructed and consultative nature of the service. Rather than being dictated to, clients felt assured that the process was very much about working together to decide on the best course of action.” [75] |
| 1.2 Arranging beneficial sources of support | “Link workers would suggest ways they might achieve their goals, which, under the model of link working, often meant onward referral or ‘linking’. Link workers were observed referring clients to exercise groups and cookery classes, amongst other activities, with certain referral pathways, such as local exercise classes, used more frequently.” [65]  “Appraisal and informational support were the most common types of support provided. Common resources that the link worker shared with patients were chronic disease self-management courses, addiction services and local exercise classes.” [76]  “54 referrals to community, voluntary and NHS services were made for the 30 participants. These are categorised as follows: long-term condition management; mental health; physical activity; weight management and healthy eating; NHS services (eg, physiotherapy), welfare rights advice (eg, benefits advice, aids and adaptations), learning/employment assistance (eg, curriculum vitae (CV) writing), voluntary work, arts-based activities (eg, choir, art therapy), community-based activities (eg, gardening, fishing, crafts). Services promoting physical activity were the most common linkage.” [67]  “Participants who received healthy eating advice and cooking skills recounted in some detail how they had reduced their intake of unhealthy food and how they were equipped with the practical skills to incorporate healthier foods into their diet. Many noted weight reduction and increased energy and fitness that enabled them to break a cycle of illness and restart activities, such as walking, shopping and gardening, which previously they felt unable to manage.” [67]    “Moreover, service users reported that SP programmes provided opportunities to learn new skills and to revive old skills.” [79]    “I just haven’t got the energy, not at all. You get the days where you are feeling dead down and you can’t be bothered. That is the way I feel at the minute…she [link worker] has asked me to join groups and different things. There are things I want to do, but over these last few months I just haven’t had the energy, I just didn’t want to go or even mix with people.” [70]  “Some described the experience as transformative: I think it’s changed my life completely…I was too fat. I had issues. Ways to Wellness has swept some of them away. It’s been a very, very positive experience.” [70]    “Before they could focus on their clients’ LTC management needs, link workers often had to deal with crises around welfare benefit appeals, evictions and debt. High demand coupled with decreasing capacity in services such as mental health support, welfare rights and housing advice meant many clients found themselves referred onto waiting lists in order to access services.” [71] |
| Additional enablers | 2.1 Desirable therapeutic relationship | “Empathy and the ability to listen empathically was widely regarded as an essential skill as were other personal attributes like the ability to be non-judgemental.” [63]  “Masood who described his link worker as ‘a friend’, Christine also described her link worker as ‘lovely to talk to’ and recalled how they met ‘to have a cup of coffee and stuff’. Christine was supported to access benefits and housing and over time, established a strong rapport with her link worker.” [64]  “I feel like a friend, when he [link worker] talks.” [64]  “The first thing is getting to know them to build a rapport.” [65]  “For all participants describing improvements following the Links Worker Programme, the relationship with the CLP was central to their narrative. An empathetic approach was consistently seen as a key component of this relationship. Patients also described feeling they had time to express themselves and allow the CLP to understand their problems and difficulties.” [66]  “For others, the interaction with the CLP was a catalyst which allowed them to overcome some initial obstacles.” [66]  “All patients were positive about the experience, describing the link worker as ‘down to earth’.” [76]  “The link worker ‘played a very valid role in helping me to get out of the house and do other things instead of feeling lonely and isolated in this world’. The link worker was the ‘kick start’ needed to get him moving again.” [76]  “Participants consistently reported feeling at ease and relaxed with their Link Worker, which enabled them to develop an open and trusting relationship.” [67]  “The Link Workers’ person-centred and non-judgemental approach facilitated trust, feelings of control and a readiness to reflect on current circumstances and implement positive changes.” [67]  “The continued link worker relationship was key for Gill in a time of traumatic disruption, and the intervention she received was person-centred, holistic and consistent.” [68]  “Service users identified the meetings with navigators and the establishment of a supportive and trust relationship as major enablers to behaviour change.” [79]  “Service users reported that they built their self-reliance, self-confidence and independence during the work with navigators, so that they felt ready to engage with the referred services.” [79]  “User responses suggested that that the privacy and empathic nature of consultation process with the social prescribing advisor played a part.” [74]  “The advisor has been a sensitive and helpful advisor, who’s given me enough latitude to open up about what are quite private matters.” [74]  “Link worker was a central figure in their experience of social prescribing and the majority of participants had developed strong relationships with their link worker.” [70] |
| 2.2 Practical arrangements | “Signposting role was insufficient; a more intensive approach was necessary such as person-centred and in a collaborative way.” [63]  “Masood experienced frequent and sustained encounters with his link worker who facilitated a range of support concerning his health and social care needs. For instance, after expressing an interest in learning how to ride a bike, Masood was supported to attend a one-to-one bike session. When on the day of the session he was hesitant to attend, his link worker accompanied him to the session. The link worker put in motion a referral to the local gym and once again accompanied him to his first session. Thereafter, the link worker telephoned Masood to remind him about his weekly gym sessions.” [64]  “If I've got any problems, I can always give [link worker] a ring’.” [64]    “If I was a nurse and I had a client who was very anxious or lacking in confidence, I would think, “There’s no point sending them to a link worker if they’re just going to give them another phone number, because this person’s not going to access it.” I would send them to someone who was going to give them the time and take them, maybe, or sit with them to help them fill in the form because that’s an assessment you would make. I mean, I feel quite strongly about this, and I know a lot of people have a different idea and we’re not supposed to handhold.” [65]  “I’m there, basically, any time,’ obviously within working hours, ‘Just phone me up if you need me, and any questions or anything.’ So basically I can see her as often as I want or as little as I want, but she likes me to keep her informed of anything happening, so she knows.’” [67]  “Of particular value was the potential to be engaged with the service for up to 2 years. Due to the long-term and complex nature of conditions which often fluctuated, participants recognised that a shorter-term approach would be inadequate, particularly when accounting for wider life events such as job loss or bereavement.” [67]  “Navigators took practical action to solve daily problems and worries of service users. Service users reported that due to SP they felt able to better cope with day to-day activities.” [79]  “Knowing that [the SP Advisor] had said to me, ‘I’ll see you in three months and we’ll see how we’re going.’ That actually was a very good incentive. I’ve been to things like Weight Watchers and things like that before…but [the SP Advisor] was taking the trouble to see me, giving me  one to one, which I think is very important…I didn’t want to let her down any more than I wanted to let myself down.” [74]  “Important for some participants were the follow up calls by the social prescribing advisor to check that the client had followed up their recommendation.” [74]  “External referrers often had unrealistic expectations of what could be achieved by SPs, and in some cases were referring clients with complex needs that exceeded the remit of their role.” [69]  “One SP experienced frustration while attempting to articulate to their colleagues that social prescribing is not “only signposting”.[69]  “One of the greatest challenges discussed by SPs was providing support to a caseload of clients with a range of complex physical, mental health and social needs.” [69]  “Some participants expressed negative views primarily due to personnel changes among link workers that resulted in lost continuity. These accounts highlighted the importance of the link worker/service user relationship and how changes to this highly-valued and often therapeutic relationship could be upsetting and lead to disengagement.” [70]  “Link workers also reported increasing numbers of referrals of clients with complex physical and mental health needs combined with multiple financial and social issues. These clients could be at crisis-point at referral.” [71]  “Link workers felt they lacked the capacity and/or expertise to offer these clients the high-intensity, specialist support they needed.” [71]  “We can even do a home visit (Intervention), because even asking someone to come and see us here for the first time is daunting (C) so I think with us, slotting in with them (M)” [72] |

Search strategies (July 2022)

Web of Science (MEDLINE)

1: (TS=(Social prescribing link worker* OR social refer* link work* OR social prescrib* coordinator* OR community liaison OR community navigator* OR community facilitator* OR community prescriber* OR community connector* OR community wellbeing officer OR social broker* OR social coach OR social connector OR health coach OR community signpost*)) AND TS=(long term condition* OR long term illness* OR chronic illness* OR chronic condition* OR chronic disease* OR chronic disorder* OR multimorbidit* OR comorbidit* OR multiple health condition* OR mental health ) Timespan: 2017-01-01 to 2022-07-18 Results: 2,423.

2: ((TS=(Social prescribing link worker* OR social refer* link work* OR social prescrib* coordinator* OR community liaison OR community navigator* OR community facilitator* OR community prescriber* OR community connector* OR community wellbeing officer OR social broker* OR social coach OR social connector OR health coach OR community signpost*)) AND TS=(long term condition* OR long term illness* OR chronic illness* OR chronic condition* OR chronic disease* OR chronic disorder* OR multimorbidit* OR comorbidit* OR multiple health condition* OR mental health )) AND Limits added: (Mesh Headings==("ADULT" OR "MIDDLE AGED" OR "AGED" OR "YOUNG ADULT" OR "AGED 80 AND OVER")) Timespan: 2017-01-01 to 2022-07-18 Results: 893.

3: ((TS=(Social prescribing link worker* OR social refer* link work* OR social prescrib* coordinator* OR community liaison OR community navigator* OR community facilitator* OR community prescriber* OR community connector* OR community wellbeing officer OR social broker* OR social coach OR social connector OR health coach OR community signpost*)) AND TS=(long term condition* OR long term illness* OR chronic illness* OR chronic condition* OR chronic disease* OR chronic disorder* OR multimorbidit* OR comorbidit* OR multiple health condition* OR mental health )) AND Limits added: (Mesh Headings==("ADULT" OR "MIDDLE AGED" OR "AGED" OR "YOUNG ADULT" OR "AGED 80 AND OVER") AND LA==("ENGLISH")) Timespan: 2017-01-01 to 2022-07-18 Results: 864.

PsycInfo

1: ( long term condition* OR long term illness* OR chronic illness* OR chronic condition* OR chronic disease* OR chronic disorder* OR multimorbidit* OR comorbidit* OR multiple health condition* OR mental health ) AND ( Social prescribing link worker* OR social refer* link work* OR social prescrib* coordinator* OR community liaison OR community navigator* OR community facilitator* OR community prescriber* OR community connector* OR community wellbeing officer OR social broker* OR social coach OR social connector OR health coach OR community signpost* ) Results: 5,162.

2: ( long term condition* OR long term illness* OR chronic illness* OR chronic condition* OR chronic disease* OR chronic disorder* OR multimorbidit* OR comorbidit* OR multiple health condition* OR mental health ) AND ( Social prescribing link worker* OR social refer* link work* OR social prescrib* coordinator* OR community liaison OR community navigator* OR community facilitator* OR community prescriber* OR community connector* OR community wellbeing officer OR social broker* OR social coach OR social connector OR health coach OR community signpost* ) with Limiters - Published Date: 201701-202207; English Language; Age Groups: Young Adulthood (18-29 yrs), Thirties (30-39 yrs), Middle Age (40-64 yrs), Aged (65 yrs & older), Very Old (85 yrs & older) Results: 628.

CINAHL

1: ( Social prescribing link worker* OR social refer* link work* OR social prescrib* coordinator* OR community liaison OR community navigator* OR community facilitator* OR community prescriber* OR community connector* OR community wellbeing officer OR social broker* OR social coach OR social connector OR health coach OR community signpost* ) AND ( long term condition* OR long term illness* OR chronic illness* OR chronic condition* OR chronic disease* OR chronic disorder* OR multimorbidit* OR comorbidit* OR multiple health condition* OR mental health ) Results: 2,211.

2: ( Social prescribing link worker* OR social refer* link work* OR social prescrib* coordinator* OR community liaison OR community navigator* OR community facilitator* OR community prescriber* OR community connector* OR community wellbeing officer OR social broker* OR social coach OR social connector OR health coach OR community signpost* ) AND ( long term condition* OR long term illness* OR chronic illness* OR chronic condition* OR chronic disease* OR chronic disorder* OR multimorbidit* OR comorbidit* OR multiple health condition* OR mental health ) with Limiters - Published Date: 201701-202207; English Language; Age Groups: All Adult Results: 395.

PubMed

1: Search: (long term condition*[Text Word] OR long term illness*[Text Word] OR chronic illness*[Text Word] OR chronic condition*[Text Word] OR chronic disease*[Text Word] OR chronic disorder*[Text Word] OR multimorbidit*[Text Word] OR comorbidit*[Text Word] OR multiple health condition*[Text Word] OR mental health[Text Word]) AND (Social prescribing link worker*[Text Word] OR social refer* link work*[Text Word] OR social prescrib* coordinator*[Text Word] OR community liaison[Text Word] OR community navigator*[Text Word] OR community facilitator*[Text Word] OR community prescriber*[Text Word] OR community connector*[Text Word] OR community wellbeing officer[Text Word] OR social broker*[Text Word] OR social coach[Text Word] OR social connector[Text Word] OR health coach[Text Word] OR community signpost*[Text Word]) Results: 363.

2: Search: (long term condition*[Text Word] OR long term illness*[Text Word] OR chronic illness*[Text Word] OR chronic condition*[Text Word] OR chronic disease*[Text Word] OR chronic disorder*[Text Word] OR multimorbidit*[Text Word] OR comorbidit*[Text Word] OR multiple health condition*[Text Word] OR mental health[Text Word]) AND (Social prescribing link worker*[Text Word] OR social refer* link work*[Text Word] OR social prescrib* coordinator*[Text Word] OR community liaison[Text Word] OR community navigator*[Text Word] OR community facilitator*[Text Word] OR community prescriber*[Text Word] OR community connector*[Text Word] OR community wellbeing officer[Text Word] OR social broker*[Text Word] OR social coach[Text Word] OR social connector[Text Word] OR health coach[Text Word] OR community signpost*[Text Word]) with Limits added: English, Young Adult: 19-24 years, Adult: 19-44 years, Middle Aged + Aged: 45+ years, Middle Aged: 45-64 years, Aged: 65+ years, 80 and over: 80+ years, from 2017/1/1 - 2022/7/17, Results: 328.

Social Care Online from SCIE

1: “social prescribing” Results: 268.

Search strategies (May 2023)

Web of Science (MEDLINE)

1: (TS=(Social prescribing link worker* OR social refer* link work* OR social prescrib* coordinator* OR community liaison OR community navigator* OR community facilitator* OR community prescriber* OR community connector* OR community wellbeing officer OR social broker* OR social coach OR social connector OR health coach OR community signpost*)) AND TS=(long term condition* OR long term illness* OR chronic illness* OR chronic condition* OR chronic disease* OR chronic disorder* OR multimorbidit* OR comorbidit* OR multiple health condition* OR mental health) AND Limits added: (Mesh Headings==("ADULT" OR "MIDDLE AGED" OR "AGED" OR "YOUNG ADULT" OR "AGED 80 AND OVER") AND LA==("ENGLISH")) Timespan: 2022-08-01 to 2023-05-20 Results: 62.

PsycInfo

1: ( long term condition* OR long term illness* OR chronic illness* OR chronic condition* OR chronic disease* OR chronic disorder* OR multimorbidit* OR comorbidit* OR multiple health condition* OR mental health ) AND ( Social prescribing link worker* OR social refer* link work* OR social prescrib* coordinator* OR community liaison OR community navigator* OR community facilitator* OR community prescriber* OR community connector* OR community wellbeing officer OR social broker* OR social coach OR social connector OR health coach OR community signpost* ) with Limiters - Published Date: 202208-202305; English Language; Age Groups: Young Adulthood (18-29 yrs), Thirties (30-39 yrs), Middle Age (40-64 yrs), Aged (65 yrs & older), Very Old (85 yrs & older) Results: 41.

CINAHL

1: ( Social prescribing link worker* OR social refer* link work* OR social prescrib* coordinator* OR community liaison OR community navigator* OR community facilitator* OR community prescriber* OR community connector* OR community wellbeing officer OR social broker* OR social coach OR social connector OR health coach OR community signpost* ) AND ( long term condition* OR long term illness* OR chronic illness* OR chronic condition* OR chronic disease* OR chronic disorder* OR multimorbidit* OR comorbidit* OR multiple health condition* OR mental health ) with Limiters - Published Date: 202208-202305; English Language; Age Groups: All Adult Results: 59.

PubMed

1: (long term condition*[Text Word] OR long term illness*[Text Word] OR chronic illness*[Text Word] OR chronic condition*[Text Word] OR chronic disease*[Text Word] OR chronic disorder*[Text Word] OR multimorbidit*[Text Word] OR comorbidit*[Text Word] OR multiple health condition*[Text Word] OR mental health[Text Word]) AND (Social prescribing link worker*[Text Word] OR social refer* link work*[Text Word] OR social prescrib* coordinator*[Text Word] OR community liaison[Text Word] OR community navigator*[Text Word] OR community facilitator*[Text Word] OR community prescriber*[Text Word] OR community connector*[Text Word] OR community wellbeing officer[Text Word] OR social broker*[Text Word] OR social coach[Text Word] OR social connector[Text Word] OR health coach[Text Word] OR community signpost*[Text Word]) with Limits added: English, Young Adult: 19-24 years, Adult: 19-44 years, Middle Aged + Aged: 45+ years, Middle Aged: 45-64 years, Aged: 65+ years, 80 and over: 80+ years, from 2022/8/1 - 2023/5/20, Results: 13.

Social Care Online from SCIE

From January 2023 Social Care Online is no longer updated, thus SCIE was not used in the updated search in May 2023 due to potential inaccuracies.

Table S3. PRISMA checklist.

| Section/ Topic | Checklist item | Location where item is reported |
| --- | --- | --- |
| **Title** | | |
| 1 Title | Identify the report as integrative review | Manuscript  Page 1 |
| **Abstract** | | |
| 2 Abstract | Provide an abstract in line to the Health & Social Care in the Community submission guidelines | Manuscript  Page 2 |
| **Introduction** | | |
| 3 Rationale | Describe the rationale for the review in the context of existing knowledge | Manuscript  Pages 2-4 |
| 4 Objectives | Provide an explicit statement of question being addressed in the review | Manuscript  Page 4 |
| **Methods** | | |
| 5 Eligibility criteria | Specify the inclusion and exclusion criteria for the review | Manuscript  Page 6-7 |
| 6 Information sources | Specify all information sources searched to identify studies and dates when each source was last searched. | Manuscript  Page 6 |
| 7 Search strategy | Present the full search strategies for all databases, including any filters and limits used | Manuscript  Pages 5-8 &  Supplementary Materials |
| 8 Selection process | State the process for selecting studies, including numbers of studies screened, assessed for eligibility and included in the review, with reasons for exclusion, ideally with a flow diagram | Manuscript  Pages 8-9 |
| 9 Data collection process | Describe method of data extraction from articles | Manuscript  Page 10 |
| 10 Study characteristics | For each eligible study, present characteristics for which data were extracted and tabulated | Manuscript  Pages 12-17 &  Supplementary Materials |
| 11 Synthesis of results | Describe the process and methods used for synthesising results of studies | Manuscript  Page 10 |
| 12 Quality assessment | Present results of quality assessment for each included study | Manuscript  Page 11 &  Supplementary Materials |
| **Results** | | |
| 13 Synthesis of results | Present synthesised results | Manuscript  Pages 18-23 |
| **Discussion** | | |
| 14 Discussion, limitations and implications | Provide a general interpretation of the results and discuss any limitations of the evidence and the review process, and implications of the results for future research and policy development | Manuscript  Pages 23-27 |
| **Other information** | | |
| 15 Availability of other materials | Report which supporting materials are publicly available and where they can be located | Supplementary Materials |
